1 **Noradrenergic but not dopaminergic neurons signal task state changes and**  
2 **predict re-engagement after a failure**

3

4

5 Caroline I Jahn<sup>1-4</sup>, Chiara Varazzani<sup>1-2</sup>, Jérôme Sallet<sup>3-4</sup>, Mark E Walton<sup>3-4</sup>, Sébastien  
6 Bouret<sup>1,\*</sup>

7 <sup>1</sup>Motivation, Brain and Behavior Team, Institut du Cerveau et de la Moelle Épineuse,  
8 75013 Paris, France

9 <sup>2</sup>Sorbonne Paris Cité universités, Université Paris Descartes, Frontières du Vivant,  
10 75005 Paris, France

11 <sup>3</sup>Department of Experimental Psychology, Oxford, OX1 3UD, United Kingdom

12 <sup>4</sup>Wellcome Centre for Integrative Neuroimaging, University of Oxford, UK

13 \*Corresponding author: [sebastien.bouret@icm-institute.org](mailto:sebastien.bouret@icm-institute.org). Team Motivation Brain  
14 and Behavior, Institut du Cerveau et de la Moelle Épineuse, Hôpital Pitié-Salpêtrière,  
15 47, boulevard de l'Hôpital, 75013 Paris, France.

16 **Abstract**

17 The two catecholamines, noradrenaline and dopamine, have been shown to play  
18 comparable roles in behaviour. Both noradrenergic and dopaminergic neurons  
19 respond to salient cues predicting reward availability and to stimulus novelty, and  
20 shape action selection strategies. However, their roles in motivation have seldom been  
21 directly compared. We therefore examined the activity of noradrenergic neurons in the  
22 *locus coeruleus* and putative midbrain dopaminergic neurons in monkeys cued to  
23 perform effortful actions for rewards. The activity in both regions correlated with the  
24 likelihood of engaging with a presented option. By contrast, only noradrenaline neurons  
25 were also (i) predictive of engagement in a subsequent trial following a failure to  
26 engage and (ii) sensitive to the task state change, the discovery of the new task  
27 condition in unrepeated trials. This indicates that while dopamine is primarily important  
28 for the promotion of actions directed towards currently available rewards,  
29 noradrenergic neurons play a crucial complementary role in mobilizing resources to  
30 promote future engagement.

## 31 **Introduction**

32 Catecholaminergic neuromodulation is thought to be critical for numerous aspects of  
33 behaviour, including motivation, learning, decision-making and behavioural flexibility  
34 (Robbins & Roberts 2007; Doya 2008; Sara 2009; Robbins & Arnsten 2009; Sara &  
35 Bouret 2012). Both noradrenaline and dopamine neurons respond to novel and salient  
36 stimuli and signal predictions of future reward (Schultz 1998; Bouret & Sara 2004;  
37 Ravel & Richmond 2006; Berridge 2007; Ventura et al. 2007; Matsumoto & Hikosaka  
38 2009; Bromberg-Martin et al. 2010) and both systems have been implicated in  
39 motivating action (Robbins & Everitt 2007; Nicola 2010; Bouret et al. 2012; Varazzani  
40 et al. 2015; Jahn et al, 2018; Walton & Bouret, 2019). Nonetheless, the specific  
41 contributions of dopamine and noradrenaline to these functions remain unclear, in part  
42 as their roles have seldom been compared in the same task (but see Bouret et al. 2012  
43 and Varazzani et al. 2015).

44 *Locus coeruleus* (LC) noradrenergic-containing neurons have a long-stated role in  
45 signalling new information about the state of the world, specifically a change in  
46 predictability of the environment (Swick et al, 1994; Vankov et al, 1995; Dalley et al,  
47 2001; Aston-Jones & Cohen, 2005; Bouret & Sara, 2005; Yu & Dayan, 2005). LC  
48 neurons are particularly sensitive to unexpected and/or novel stimuli (Kety 1972; Foote  
49 et al. 1980; Aston-Jones & Bloom 1981; Grant et al, 1988; Sara & Segal, 1991; Vankov  
50 et al, 1995; Bouret & Sara, 2004; Bouret et al, 2012), and the transient activation of LC  
51 neurons in response to unexpected stimuli is often thought to facilitate adaptation  
52 through an increase in behavioural flexibility (Bouret & Sara, 2005; Dayan & Yu, 2006,  
53 Einhauser et al, 2008; Nassar et al, 2012, Urai et al. 2017; Muller et al. 2019). In that

54 frame, the magnitude of LC responses to sensory stimuli increases when these stimuli  
55 are unexpected, and therefore provide information about the state of the world that  
56 may be useful to guide subsequent behaviour. By contrast, perfectly expected stimuli  
57 provide little information, and so their presentation should not require the updating of  
58 behaviour. In other words, such a function could allow the activation of LC neurons to  
59 promote the adaptation of behaviour in response to a change in the state of the world  
60 (Aston-Jones & Cohen, 2005; Bouret & Sara, 2005; Yu & Dayan, 2005). Such a role  
61 for noradrenaline in behavioural flexibility has received strong support from  
62 pharmacological studies (Devauges & Sara, 1990; Tait et al, 2007; McGaughy et al,  
63 2008; Jahn et al, 2018; Jepma et al, 2018).

64 More recently, noradrenaline function has been extended to include the promotion of  
65 effortful actions (Ventura et al. 2008; Bouret & Richmond 2009; Zénon et al. 2014;  
66 Varazzani et al. 2015). Indeed, LC neurons are reliably activated when animals initiate  
67 an action (Bouret & Sara, 2004; Rajkowski et al, 2004; Kalwani et al 2014). Critically,  
68 the magnitude of this activation seems to be related to the amount of effort necessary  
69 to trigger the action (Bouret & Richmond, 2015; Varazzani et al, 2015). In line with this  
70 interpretation, we recently used a pharmacological manipulation to demonstrate  
71 directly that, on top of its role in behavioural flexibility, noradrenaline was also causally  
72 involved in motivation (Jahn et al, 2018). One interpretation of the dual role of  
73 noradrenergic LC neurons in behavioural flexibility and motivation is that flexibility  
74 relies upon their response to unexpected stimuli whereas their role in motivation relies  
75 upon their activation at the triggering of effortful actions. Alternatively, the response of  
76 LC neurons to unexpected stimuli could be directly related to motivation.

77 Since the tripartite relationship among LC activity, processing of expected vs  
78 unexpected stimuli, and motivation remain unexplored, we re-analysed a data set of  
79 noradrenergic neurons in the LC recorded in monkeys presented with cues signalling  
80 how much effort they would need to expend to gain rewards of various sizes (Varazzani  
81 et al. 2015). The task was designed such that rejecting an offer caused it to be re-  
82 presented on the subsequent trial, and the analyses reported by Varazzani et al. (2015)  
83 deliberately excluded such repeated trials. Here, by including those trials, we could  
84 investigate separately (i) the sensitivity to task state changes in unrepeated vs.  
85 repeated trials and (ii) the encoding of motivational processes, by examining the  
86 modulation of LC activity by willingness to perform the presented option (engagement)  
87 in the current or in the future trials.

88 Moreover, to gain further insight on the specific role of noradrenaline as compared to  
89 dopamine neurons, we compared the activity of LC neurons to that of putative DA  
90 neurons recorded from *substantia nigra pars compacta* and *ventral tegmental area*  
91 (SNc/VTA) in the same paradigm. Indeed, dopamine is also implicated in novelty and  
92 information seeking (Horvitz et al. 1997; Schultz 1998; Costa et al. 2014; Bromberg-  
93 Martin & Hikosaka, 2009; Naudé et al. 2016), as well as playing a prominent role in  
94 motivation and action initiation (Walton & Bouret, 2019). As for LC noradrenergic  
95 neurons, we could examine separately the relation between dopaminergic neurons  
96 and sensitivity to task state changes and willingness to perform the presented option.

97 We found that that although the magnitude of the neuronal response at the cue  
98 predicted the engagement in effortful actions similarly in the two catecholaminergic  
99 systems, only noradrenaline neurons were sensitive to changes in task state, i.e. to  
100 the difference between repeated (and therefore perfectly expected) and unrepeated

101 (and therefore informative) stimuli. Moreover, while dopamine neurons only reflected  
102 the engagement at the cue onset, noradrenaline cells were also activated by erroneous  
103 fixation breaks, in a manner that predicted the likelihood of future engagement after  
104 erroneous trials. Taken together, our analyses demonstrate complementary but  
105 distinct roles for noradrenaline and dopamine in signalling new states of the world and  
106 in motivating current or future engagement with effortful actions.

## 107 **Results**

### 108 *Behaviour*

109 Three monkeys were trained to perform a task in which visual cues indicated the  
110 amount of effort (3 effort levels) that was required to obtain a reward (3 reward levels)  
111 (fig 1A and B). Effort and reward levels were manipulated independently across the 9  
112 task conditions. On a given trial, monkeys could either engage in the effortful action  
113 (whether action is correct or not) or fail to engage by breaking fixation (the proportion  
114 of trials where monkeys maintained fixation and omitted the response was negligible).  
115 Importantly, unsuccessful trials, which effectively represent a failure, were repeated  
116 (see Material and Methods and figure 1 for details).

117 The monkeys' willingness to engage in the task – measured as the attempt to squeeze  
118 the clamp after seeing the cue – was clearly affected by the information about the  
119 upcoming effort and reward levels (task condition) of the trial (fig 1C-D). In both  
120 sessions when noradrenergic (NA) or dopaminergic (DA) neurons were recorded from,  
121 the likelihood of engagement in the effortful action was negatively affected by the effort  
122 level (NA:  $\beta=-0.19\pm0.03$ ,  $t(91)=-6.19$ ,  $p<0.001$ ; DA:  $\beta=-0.26\pm0.03$ ,  $t(83)=-8.43$ ,  
123  $p<0.001$ ) and positively modulated by the reward level (NA:  $\beta=0.27\pm0.04$ ,  $t(91)=6.93$ ,  
124  $p<0.001$ ; DA:  $\beta=0.31\pm0.04$ ,  $t(83)=8.78$ ,  $p<0.001$ ). Moreover, monkeys' engagement  
125 was negatively modulated by the trial number (NA:  $\beta=-0.13\pm0.03$ ,  $t(91)=-4.11$ ,  
126  $p<0.001$ ; DA:  $\beta=-0.12\pm0.05$ ,  $t(83)=-2.58$ ,  $p<0.001$ ) (fig 1D). Note that there was no  
127 significant difference between effort level, reward level and trial number weights in  
128 engagement across for NA and DA recording sessions ( $p=0.13$ ,  $p=0.52$  and  $p=0.88$   
129 respectively). This was confirmed by a 2-way ANOVA measuring the effect of task

130 factor (effort and reward) and recording type (NA or DA) onto  $-\beta(\text{effort})$  and  $\beta(\text{reward})$ :  
 131 main effect of task factor  $F(1,348)=3.35$ ,  $p=0.07$ ) but no main effect of recording  
 132 session type ( $F(1,348)=2.14$ ,  $p=0.15$ ) and no interaction ( $F(2,348)=0.23$ ,  $p=0.63$ ),  
 133 meaning that engagement was affected in the same way by the two task factors in both  
 134 types of recordings.  
 135

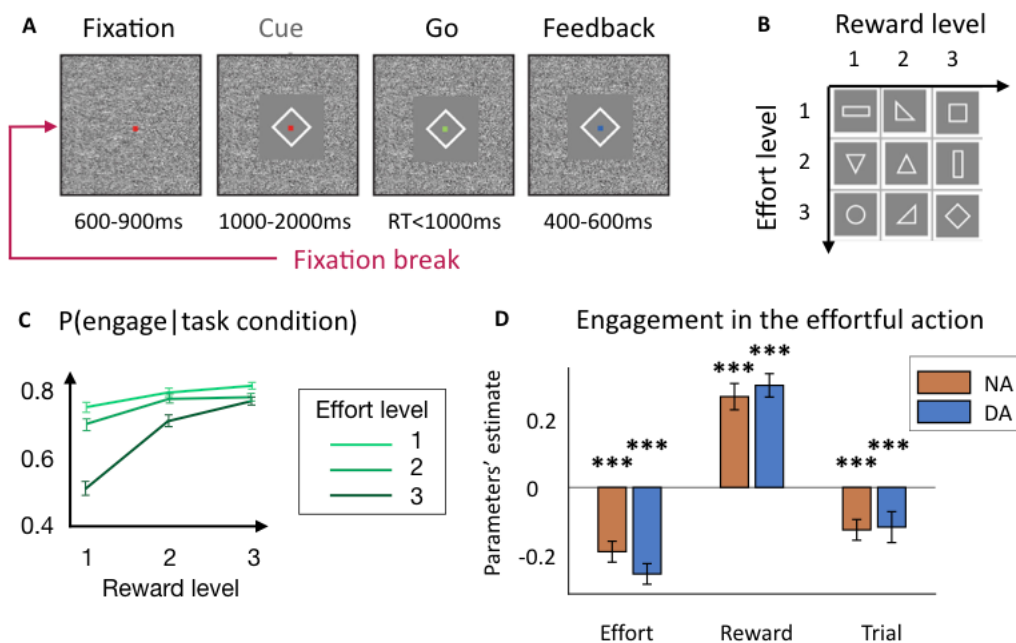

136  
 137 *Figure 1: Task and behaviour*  
 138 *A) Task structure. Monkeys had to squeeze a clamp with a certain minimum intensity to obtain reward*  
 139 *of a certain magnitude. During the whole trial, monkeys had to maintain fixation on a dot at the centre*  
 140 *of the screen. If they broke the fixation, the trial restarted from the start after an inter-trial interval delay.*  
 141 *A trial started with monkeys fixating the red dot, then a cue appeared indicating the effort and reward*  
 142 *levels for the current trial. The dot turned green (Go signal) and monkeys had to squeeze the clamp to*  
 143 *the minimum force threshold indicated by the cue. Upon reaching this threshold, the dot turned blue*  
 144 *(Feedback) and remained blue as long as monkeys had to keep on squeezing. If monkeys maintain the*  
 145 *effort long enough, they received the amount of reward indicated by the cue.*  
 146 *B) Task design. Each trial corresponded to one of nine experimental conditions, defined by three levels*  
 147 *of effort and three levels of reward.*  
 148 *C) Probability to engage with the action as a function of effort and reward levels. Computed for all NA*  
 149 *and DA sessions together.*



150 *D) Weights of the task parameters in the decision to engage with the effortful action. Multi-level logistic*  
151 *regression of the decision to initiate the action by the three experimental task parameters: effort level,*  
152 *reward level and trial number. Significant negative effect of effort level ( $p < 0.001$ ) and trial number*  
153 *( $p < 0.001$ ) and significant positive effect of reward level ( $p < 0.001$ ) in both NA and DA session (no*  
154 *difference between NA and DA sessions for all three parameters ( $p < 0.05$ )). \*\*\*  $p \leq 0.001$ .*

155

156 *Noradrenergic and dopaminergic neurons' activity reflects monkeys' engagement in*  
157 *the task*

158 We have seen previously that the task factors (i.e. effort level, reward level and trial  
159 number) influenced the probability of monkeys to engage with the effortful action.  
160 Therefore, we first measured the influence of these task factors on neurons' activity at  
161 the time of cue. Dopaminergic neurons' activity was significantly positively modulated  
162 by reward level ( $\beta = 0.05 \pm 0.01$ ,  $t(83) = 3.67$ ,  $p < 0.001$ ) and negatively modulated by the  
163 effort level ( $\beta = -0.02 \pm 0.001$ ,  $t(83) = -2.01$ ,  $p = 0.05$ ), as well as by trial number ( $\beta =$   
164  $0.06 \pm 0.03$ ,  $t(83) = -2.53$ ,  $p = 0.01$ ) (fig. 2A). Noradrenergic neurons' activity was only  
165 significantly modulated by the reward size ( $\beta = 0.04 \pm 0.001$ ,  $t(91) = 4.05$ ,  $p < 0.001$ ) but not  
166 reliably modulated by either the effort level ( $\beta = -0.01 \pm 0.01$ ,  $t(91) = -1.15$ ,  $p = 0.25$ ) nor trial  
167 number ( $\beta = -0.03 \pm 0.03$ ,  $t(91) = -1.02$ ,  $p = 0.31$ ) (fig 2A). However, we found no significant  
168 difference between the encoding of the effort level and the trial number between  
169 dopaminergic and noradrenergic neurons ( $p = 0.42$  and  $p = 0.37$  respectively). Critically,  
170 there was a significant difference between the weights of effort and reward in the firing  
171 rates of both noradrenergic and dopaminergic neurons (2-way ANOVA measuring the  
172 effect of task factor (effort and reward) and recording type (NA or DA) onto  $-\beta(\text{effort})$   
173 and  $\beta(\text{reward})$ : main effect of task factor  $F(1,348) = 9.71$ ,  $p = 0.02$ ) but no main effect of  
174 recording session type ( $F(1,348) = 0.61$ ,  $p = 0.4$ ) and no interaction ( $F(2,348) = 0.04$ ,

175  $p=0.8$ ). This means that the relative sensitivity of noradrenergic and dopaminergic  
176 neurons to the task factors was similar, with a greater sensitivity for reward than effort  
177 (post-hoc T-test on the distribution of  $-\beta(\text{effort})$  and  $\beta(\text{reward})$ :  $t(350)=-3.13$ ,  $p=0.002$ ).

178 After having considered the relation between neuronal activity and task factors, we  
179 looked at the relationship between neuronal activity and the engagement in the effortful  
180 action. First, we did it across the nine task conditions (defined by a combination of  
181 effort and reward levels) by using an aggregate measure of the engagement for each  
182 condition (the probability to engage given the task condition). This tested whether  
183 neuronal activity directly reflected the probability for the monkeys to engage in a  
184 particular task condition. For each recording, we regressed this z-scored probability of  
185 engagement on neurons' activity and found a significant positive effect at the  
186 population level, for both noradrenergic and dopaminergic neurons (NA:  $\beta=0.04\pm 0.01$ ,  
187  $t(91)=3.70$ ,  $p<0.001$ , DA:  $\beta=0.03\pm 0.01$ ,  $t(83)=2.16$ ,  $p=0.03$ ) (fig 2B). Again, there was  
188 no difference in the strength of this signal encoding between populations ( $p=0.50$ ).  
189 Moreover, this activity was specific to the onset of the cue as there was no significant  
190 encoding of this probability before the cue onset (pre-cue period) even in repeated  
191 trials, in which monkeys already knew which cue was coming (500ms window before  
192 cue onset: NA:  $p=0.17$ , DA:  $p=0.71$ ). We also examined the relation between neuronal  
193 activity and engagement on a trial by trial basis. We found that both noradrenergic and  
194 dopaminergic responses were predictive of engagement on a trial by trial basis (NA:  
195  $\beta=0.06\pm 0.03$ ,  $t(91)=2.47$ ,  $p=0.01$ ; DA:  $\beta=0.06\pm 0.03$ ,  $t(83)=2.36$ ,  $p=0.02$ ) (fig 2C). Here  
196 again, there was no difference in the strength of this signal encoding between  
197 dopaminergic and noradrenergic neurons ( $p=0.96$ ). Moreover, the activity was specific

198 to the onset of the cue, with no encoding of engagement in the pre-cue period (NA:  
 199  $p=0.08$ , DA:  $p=0.88$ ).

200 Overall, we found that even if, contrary to behaviour, the activity of the noradrenergic  
 201 and dopaminergic systems is biased toward the encoding of reward compared to effort  
 202 the firing of these neurons reflected the engagement in the effortful action in a similar  
 203 fashion at the time of the cue.

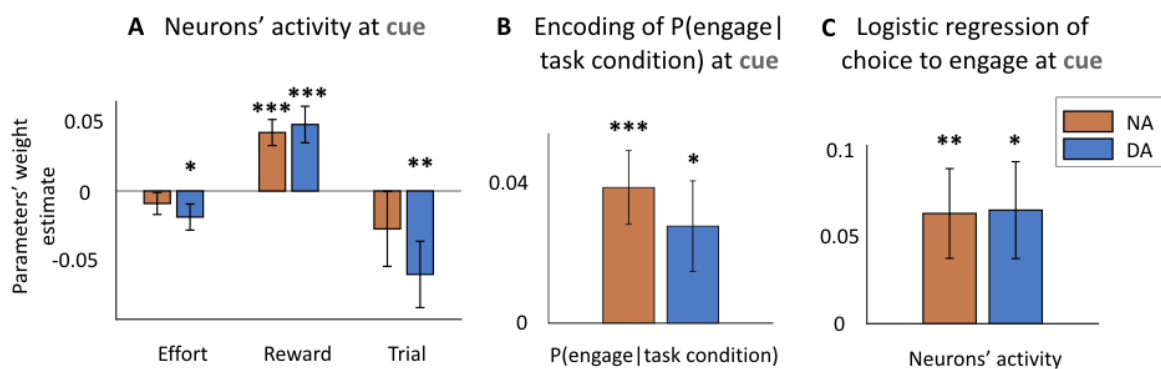

204  
 205 *Figure 2: noradrenergic and dopaminergic neurons encoding of the task parameters and engagement*  
 206 *at the time of cue*

207 *A) Encoding of task parameters at the time of cue (0-500ms from cue onset). Dopaminergic neurons*  
 208 *were sensitive to all three task parameters (effort level:  $p=0.05$ ; reward level:  $p<0.001$ ; trial number:*  
 209  *$p=0.01$ ). Noradrenergic neurons were only significantly sensitive to the reward level ( $p<0.001$ ). No*  
 210 *significant difference between the encoding of effort level and trial number in noradrenergic and*  
 211 *dopaminergic neurons ( $p>0.05$ ). \*  $p < 0.05$ ; \*\*  $p \leq 0.01$ ; \*\*\*  $p \leq 0.001$ .*

212 *B) Noradrenergic and dopaminergic neurons reflect the engagement in a task condition. Linear*  
 213 *regression of the probability to engage in a given task condition (effort and reward levels) for each*  
 214 *session. Both populations encode significantly the probability to engage ( $p<0.05$ ), no difference between*  
 215 *the strength of encoding across populations ( $p>0.05$ ). \*  $p < 0.05$ ; \*\*  $p \leq 0.01$ ; \*\*\*  $p \leq 0.001$ .*

216 *C) Noradrenergic and dopaminergic neurons' activity reflects the engagement on a trial-by-trial basis*  
 217 *throughout the session. Logistic regression of Noradrenergic and dopaminergic neurons' activity on*  
 218 *engagement in the action. Both populations predict the engagement in the action ( $p<0.05$ ). \*  $p < 0.05$ ;*  
 219 *\*\*  $p \leq 0.01$ ; \*\*\*  $p \leq 0.001$ .*

220

221 *Both noradrenergic and dopaminergic neurons encode monkeys' engagement, but*  
222 *only noradrenergic neurons are sensitive to changes in task state*

223 In order to understand if catecholaminergic neurons also encode changes in task  
224 states (i.e. when their responses to cues differed between repeated and non-repeated  
225 trials) and to determine the relationship between this factor and motivation  
226 (engagement), we compared the encoding of these two variables at the time of cue.  
227 To examine the effect of changes in task states, we compared cue-evoked activity in  
228 repeated ('non-informative cue') versus non-repeated ('informative cue') trials. Since  
229 erroneous trials were repeated, and monkeys knew the structure of the task, they could  
230 predict following an error that the same condition (with the same visual cue) would be  
231 presented again, such that the visual cue provided no information about the task state.  
232 By contrast, after a correct trial, any of the nine task conditions could be pseudo-  
233 randomly presented to the monkey, such that visual cues now provided information  
234 about the upcoming reward and effort levels (task state). Erroneous trials were mainly  
235 of two types: (i) monkeys broke the fixation (no engagement) and (ii) monkeys engaged  
236 (tried to squeeze the clamp) but did not execute the action correctly. Therefore, as not  
237 all trials in which monkeys engaged were successful, we were able to look conjointly  
238 at the effect of engagement and the information being presented on neuronal activity.

239 First, we found no interaction between the linear encoding of the effort, reward levels  
240 and trial number with whether the trial was repeated or not in either noradrenergic  
241 neurons or dopaminergic neurons (see Materials and Methods, NA:  $p=0.24$ ,  $p=0.26$   
242 and  $p=0.58$  respectively; DA:  $p=0.26$ ,  $p=0.27$  and  $p=0.10$  respectively). This means

243 that the task condition was encoded in a similar fashion whether the cue was  
244 informative or not.

245 To examine the effect of engagement and task state change above and beyond the  
246 effect of a particular task condition (effort and reward levels), we regressed out the  
247 effect of the task condition on the firing rate of neurons and looked at the effect of  
248 engagement and task state change (unrepeated vs. repeated trials) on the remaining  
249 neuronal activity (see Material and Methods). Here, we found an important dissociation  
250 between the activity of noradrenergic and dopaminergic neurons (fig 3). For a given  
251 trial condition, noradrenergic neurons were more active either when the action was  
252 initiated (vs not) *or* when the cue provided information about the new task condition (in  
253 unrepeated vs repeated trials) in a given experimental condition  
254 ( $\beta(\text{engagement})=0.11\pm 0.03$ ,  $t(91)=3.40$ ,  $p<0.001$ ;  $\beta(\text{task state change})=0.16\pm 0.04$ ,  
255  $t(91)=4.23$ ,  $p<0.001$ ). We also found a significant negative interaction ( $\beta(\text{interaction})=-$   
256  $0.06\pm 0.02$ ,  $t(91)=-3.02$ ,  $p=0.003$ ), which indicates that engagement and information  
257 effects were not perfectly additive: when both factors were combined, the firing rate  
258 increased less than by the sum of the two separate effects. On the other hand, while  
259 dopaminergic neurons were on average more active when monkeys engaged in a  
260 given condition ( $\beta=0.08\pm 0.04$ ,  $t(83)=2.05$ ,  $p=0.04$ ), they were *not* sensitive to the task  
261 state change ( $p=0.56$ ). There was also no significant interaction between the two  
262 effects ( $p=0.36$ ), and the main effects were similar when we removed the interaction.  
263 A direct comparison of these effects between noradrenergic and dopaminergic  
264 neurons confirmed that, while there was no difference in the strength of their encoding  
265 of engagement in the task ( $p=0.59$ ) noradrenergic neurons encoded significantly more  
266 task state change than dopaminergic neurons ( $p<0.001$ ).

267 Here again, this effect was specific of the onset of the cue as when we examined the  
268 500ms pre-cue period, there was neither an effect of engagement (NA:  $p=0.17$ , DA:  
269  $p=0.77$ ) nor an effect of task state change (NA:  $p=0.96$ , DA:  $p=0.07$ ). There was also  
270 no effect of engagement in the pre-cue period if we only examined repeated trials  
271 where monkeys already knew the task condition (NA:  $p=0.31$ , DA:  $p=0.47$ ). In short,  
272 when comparing the encoding of engagement and task state change (unrepeated vs.  
273 repeated trials) variables over and above the task variables, both noradrenergic and  
274 dopaminergic neurons encoded the engagement in the task, but only noradrenergic  
275 neurons encoded the task state change (whether the cue was informative or not). In  
276 addition, these effects were unaffected by the addition of trial number to the analyses,  
277 which captures the influence of fatigue and satiety (main effects of engagement and  
278 task state change remained as described before; main effect of trial number: NA:  
279  $p=0.47$ , DA:  $p=0.02$ ; interaction of engagement and task state change with trial number  
280 did not reach significance in either noradrenergic or dopaminergic neurons, NA:  
281  $p(\text{engagement})=0.84$ ,  $p(\text{task state change})=0.97$ , DA:  $p(\text{engagement})=0.91$ ,  $p(\text{task}$   
282  $\text{state change})=0.19$ ) (see supplemental figure 1A). Thus, engagement and task state  
283 change had specific effects on neurons' firing rates, which in turn were independent of  
284 the progression in the session.

285

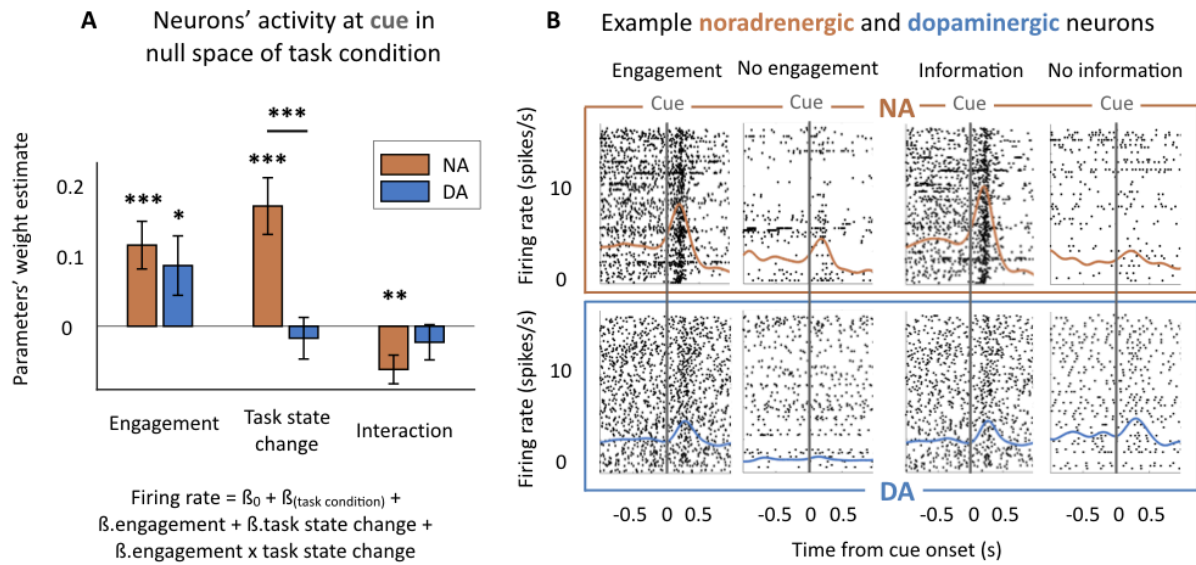

286

287 *Figure 3: Change in task condition is encoded by noradrenergic but not dopaminergic neurons*

288 *A) Encoding of engagement and trial repetition in null space of task condition at cue (0-500ms from cue*  
 289 *onset). Noradrenergic neurons encoded significantly the change in trial condition, the engagement and*  
 290 *the interaction (all  $p < 0.01$ ). Dopaminergic neurons encoded only significantly the engagement ( $p < 0.05$ ).*  
 291 *\*  $p < 0.05$ ; \*\*  $p \leq 0.01$ ; \*\*\*  $p \leq 0.001$*

292 *B) Example noradrenergic and dopaminergic neurons. Neuronal activity of two representative neurons*  
 293 *around the cue onset (grey vertical line). Top: spike activity (raster and spike density function) of a*  
 294 *noradrenergic neuron showing a strong activation at cue. The activation is stronger in engaged vs. non-*  
 295 *engaged trials (all experimental conditions pooled together) and for informative vs. non-informative*  
 296 *cues. Bottom: same but for a dopaminergic neuron showing an intermediate activation at cue onset. Its*  
 297 *activity was greater for engaged than non-engaged trials but was not modulated by the task state change*  
 298 *of the cue. Note, even though the baseline firing appears different in these example neurons, there was*  
 299 *no reliable effect of engagement before cue onset. Each panel corresponds to a different number of*  
 300 *trials (each trial is a line in the raster plot).*

301

302 *Only noradrenergic neurons were activated after a failure to engage and are sensitive*  
 303 *to the task condition*

304 We next examined the activity of dopaminergic and noradrenergic neurons time-locked  
 305 to fixation break, which resulted in trial abortion. We focused our analysis on three  
 306 epochs: a baseline epoch from -600 to -300ms prior to fixation; a pre-fixation break



307 epoch corresponding to the 300ms prior to fixation break, and post fixation break epoch  
308 corresponding to the 300ms following fixation break. There was neither a significant  
309 activation of dopaminergic neurons before fixation break ( $p=0.62$ ) nor after the fixation  
310 break ( $p=0.49$ ). By contrast, noradrenergic neurons were significantly activated after  
311 (mean difference= $0.30\pm 0.09$  spikes/s,  $t(83)=3.31$ ,  $p=0.001$ ), but not before ( $p=0.81$ )  
312 the fixation break had occurred. This activation corresponds to an average change of  
313  $16.5\%\pm 0.04$  of activity between before (average firing rate = 2.83 spikes/s) and after  
314 (average firing rate = 3.12 spikes/s) the fixation break (fig 4A). At the single neuron  
315 level, 18.1% noradrenergic neurons were activated at the fixation break (one-tailed T-  
316 test: firing rate(pre fixation break) < firing rate(post fixation break),  $p<0.05$  were  
317 considered as significant). Note that all results hold true if we removed fixation break  
318 events that occurred less than 500ms after the cue onset.

319 We then looked at the modulation of fixation-break related activity across task  
320 conditions. The firing of dopaminergic neurons did not show any significant modulation  
321 across task conditions (probability to engage with the task condition:  $p=0.97$ ) or  
322 behavioural responses (engagement in the next trial:  $p=0.45$ ) and it will not be  
323 described further. By contrast, noradrenergic neurons' evoked activity was positively  
324 modulated by the reward size ( $\beta=0.06\pm 0.02$ ,  $t(83)=3.64$ ,  $p<0.001$ ) but neither by the  
325 effort level nor by the trial number ( $\beta(\text{effort level})=-0.01\pm 0.02$ ,  $t(83)=-0.91$ ,  $p=0.37$ ;  
326  $\beta(\text{trial number})=-0.04\pm 0.03$ ,  $t(83)=-1.31$ ,  $p=0.20$ ) (fig 4B). Note however, that the  
327 difference between the sensitivity to effort and reward did not reach significance (t-test  
328 on  $-\beta(\text{effort})$  and  $\beta(\text{reward})$ :  $t(166)=1.88$ ,  $p=0.06$ ). This activity was specific to the  
329 onset of the fixation break as there was no modulation of the activity by these task



330 factors in the 300ms before the fixation break (effort level:  $p=0.50$ ; reward level:  
 331  $p=0.15$ ; trial number:  $p=0.9$ ).

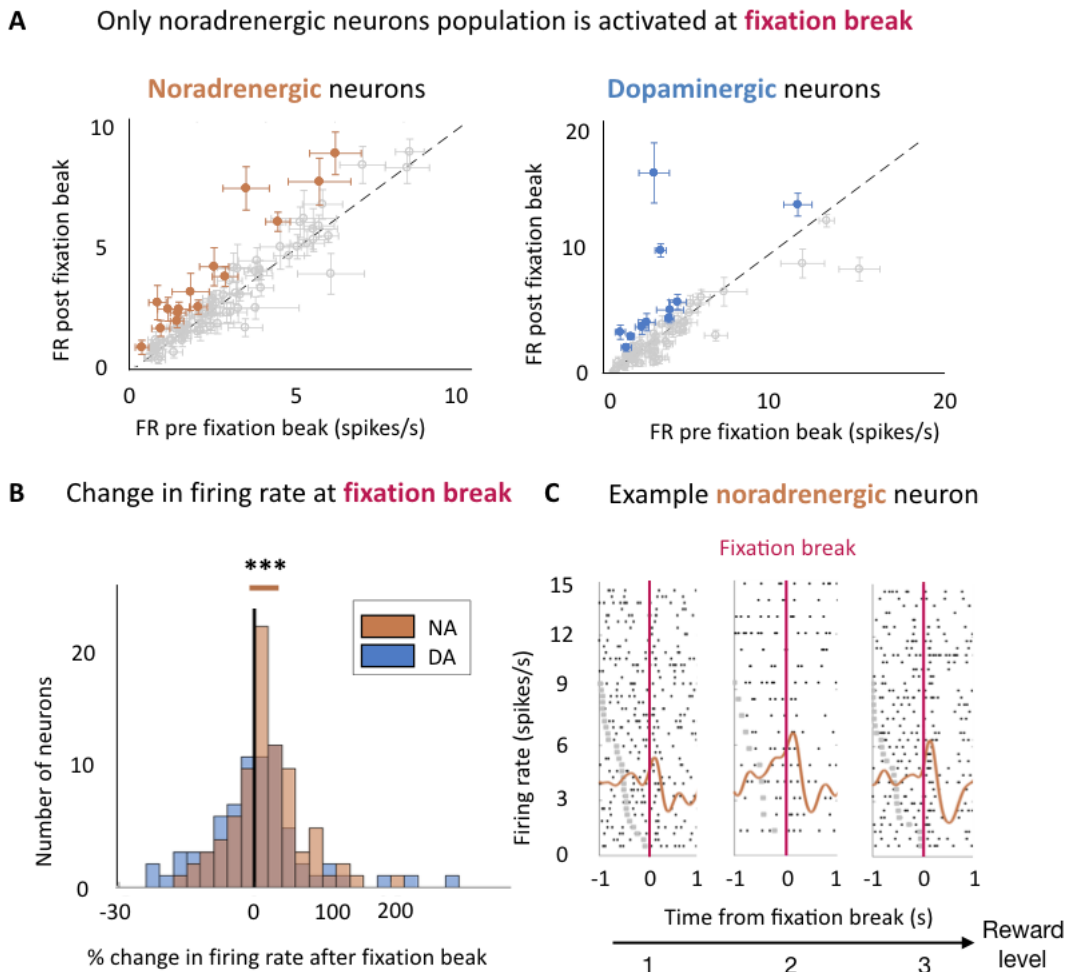

332

333

334 *Figure 4: Noradrenergic but not dopaminergic neurons were activated after the fixation break*

335 *A) Only noradrenergic neurons population is activated at fixation break. Firing rate pre (-300 – 0ms) and*  
 336 *post (0 – 300s) fixation break for both noradrenergic (left) and dopaminergic neurons (right). Points and*  
 337 *error bars are mean  $\pm$  SEM. Solid points indicate a significant activation (One-tailed T-test,  $p<0.05$ ). For*  
 338 *illustration purposes only, we have removed two dopaminergic neurons (with a non-significant activation*  
 339 *at fixation break), whose firing rates were above 20 spikes/s from the display.*

340 *B) Noradrenergic and Dopaminergic neurons' change in firing rate evoked by activity after fixation break*  
 341 *(0-300ms from fixation break). The distributions are represented on a log-scale. Noradrenergic neurons*  
 342 *population was significantly activated after the fixation break ( $p=0.001$ ) but not dopaminergic neurons*  
 343 *population ( $p=0.49$ ). \*\*\*  $p \leq 0.001$ .*

344 *C) Example noradrenergic neurons at fixation break for each reward level. Neuronal activity*  
 345 *representative of noradrenergic neuron around fixation break (pink vertical line). Trials are sorted by*  
 346 *decreasing latency between cue onset (grey dots) and fixation break. Cue onset is only visible for bottom*

347 *trials, with latencies shorter than the displayed 1 sec. Spike activity (raster and spike density function)*  
348 *of a noradrenergic neuron showing an increase after the fixation break. In addition, its activity is*  
349 *modulated by the reward level ( $p < 0.001$ ).*

350

351 *Noradrenergic neurons activity predicted the engagement on the next trial*

352 Finally, we examined the relationship between fixation-break evoked activity and the  
353 probability, across sessions, that the monkeys engaged on the next trial. Here again,  
354 we only looked at fixation break events that occurred after cue onset, meaning that the  
355 monkeys always knew the task condition at the time of the fixation break.

356 We found a significant positive effect of the probability to engage given the task  
357 condition on LC activity at the time of the fixation break ( $\beta = 0.05 \pm 0.02$ ,  $t(83) = 2.79$ ,  
358  $p = 0.007$ ). In other words, the more monkeys tended to engage in a specific task  
359 condition, the more noradrenergic neurons would be active if a fixation break occurred  
360 in this task condition. This effect was also present in the pre-fixation break activity (-  
361 300-0ms to fixation break) ( $\beta = 0.15 \pm 0.06$ ,  $t(83) = 2.55$ ,  $p = 0.01$ ), suggesting that it  
362 appeared after cue onset, in line with the fact that noradrenergic neurons also  
363 displayed a positive relation with task engagement at the time of the cue onset (fig 2B).  
364 Indeed, we found a significant positive correlation ( $r = 0.33$ ,  $p = 0.002$ ) between the  
365 strength of the encoding of the probability to engage at the time of cue and at the time  
366 of the post-fixation break (fig 5B). In short, noradrenergic neurons were activated both  
367 at cue onset and at the fixation break when it occurred. They tended to be more active  
368 in conditions associated with a greater probability of engagement, both at the cue onset  
369 and at the time of fixation break, and these two responses were correlated across the  
370 population of LC neurons.

371 Given this strong relation between LC activity and probability of engagement in the  
372 current trial when monkeys erroneously break fixation, we were interested to examine  
373 whether this activity could also predict monkeys' likelihood of engagement in the  
374 following trial. After a fixation break, two things could happen on the next trial (and  
375 therefore in the same task condition): monkeys could now choose to engage with the  
376 same task condition or could again reject the offer (fig 5A). We therefore examined if  
377 LC activity at the time of fixation break could provide information about engagement in  
378 the next trial, over and above task condition.

379 In fact, the magnitude of the fixation-break activation of noradrenergic neurons  
380 (controlled for task condition) was predictive of subsequent engagement in the next  
381 trial ( $\beta=0.12\pm0.003$ ,  $t(83)=3.84$ ,  $p<0.001$ ; effect calculated on the z-scored distributions  
382 of firing rates and translating to an average difference of  $25.1\%\pm0.1$  of activity between  
383 non-engage and engage on the next trial conditions) (fig 5C). At the single neuron  
384 level, only 6.5% of neurons showed a significant effect (compared to 7.6% of neurons  
385 showing a significant sensitivity to reward at fixation break and 20.6% at cue). Hence,  
386 although the effects seen at the fixation break are relatively weak at the single neuron  
387 level, they are very consistent across the population, such that at the population level  
388 the effect clearly reaches significance. In fact 66.3% of neurons showed small but  
389 consistently greater activation in trials in which monkeys engage on the next trial, which  
390 is comparable to the proportion of neuron displaying a positive relation with reward at  
391 the fixation break (63%) or at the cue (66.3%). We controlled for potential interactions  
392 with confounding factors such as task state change (whether the erroneous trial was  
393 itself a repeated or not), trial number and their interactions with the effect of the  
394 engagement in the next trial, but none of them were significant (main effects:

395 p(information)=0.18, p(trial number)=0.15; interactions with engagement with next trial:  
396 p(information)=0.27, p(trial number)=0.81). As previously mentioned, this activity was  
397 specific of noradrenergic neurons as dopaminergic neurons were not activated post-  
398 fixation break and did not signal the engagement in the next trial ( $p=0.45$ ) (see  
399 supplemental figure 1B).

400 Finally, we looked whether the effect of the engagement in the next trial could be found  
401 before the cue of the next trials. In other words, we looked if we could predict the  
402 engagement before the cue (-500 – 0ms) for trials where a fixation break occurred. We  
403 found that it was not the case ( $p=0.25$ ) and could therefore only conclude that  
404 noradrenergic neurons predict the engagement on a trial-by-trial basis.

405 In summary, we found that noradrenergic but not dopaminergic neurons' activity at  
406 fixation break reflected the probability to engage both in the current and in the  
407 subsequent trial, over and above cost-benefit task conditions.

408

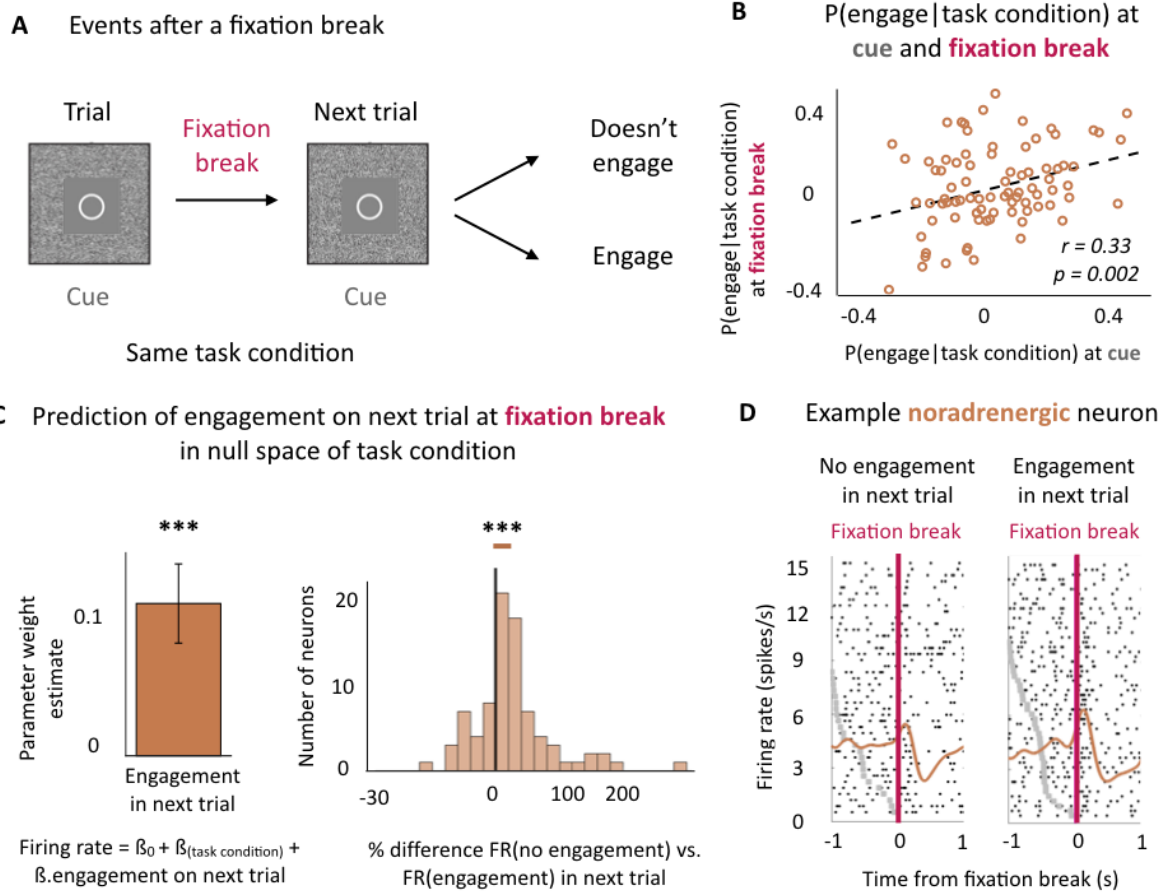

409

410

411 *Figure 5: Noradrenergic neurons' activity predicts the engagement on the next trial*

412 *A) Task structure after a fixation break.*

413 *B) Correlation between noradrenergic neurons' encoding of the probability to engage for each task*  
 414 *condition at the cue onset and the fixation break across sessions. Significant correlation ( $r=0.33$ ,*  
 415  *$p<0.01$ ).*

416 *C) Noradrenergic neurons' activity at fixation break is predictive of engagement in the next trial above*  
 417 *and beyond the task condition. Linear regression, significant effect ( $p<0.001$ ). % difference between the*  
 418 *firing rate distribution for no engagement in next trial and engagement in next trial in the null space of*  
 419 *task conditions (mixed effect linear regressions on non-z-scored distributions). The distribution is*  
 420 *represented on a log-scale. Significant difference ( $p<0.001$ ). \*\*\*  $p \leq 0.001$ .*

421 *D) Example noradrenergic neurons at fixation break for no engagement (left) and engagement (right) in*  
 422 *the next trial. Neuronal activity (raster and spike density function) is displayed around fixation break ( $t=0$ ,*  
 423 *pink vertical line). Trials are sorted by decreasing latency between cue onset (grey dots) and fixation*  
 424 *break. Cue onset is only visible for bottom trials, with latencies shorter than the displayed 1 sec. As a*  
 425 *majority of LC neurons, this one shows a stronger activation when monkeys engaged on the next trial*  
 426 *( $p<0.001$ ).*

## 427 **Discussion**

428 In this task, monkeys were presented with informative (non-repeated) and non-  
429 informative (repeated) cues instructing them to produce actions of different intensities  
430 to gain rewards of different magnitudes. The probability that monkeys would try to  
431 produce the action (engagement) depended on the task condition (effort and reward  
432 levels) but failing to engage would only lead to the repetition of the same task condition.  
433 Repeated trials constituted series of actions towards the same goal: the reward. This  
434 goal directed behaviour ended when the goal was reached. From that perspective,  
435 there is a clear transition in behaviour after a correct trial, as animals get started on  
436 another trial, another goal directed behaviour (Bouret & Richmond 2009). Hence, given  
437 the structure of the task, unrepeated trials are more likely to constitute a task state  
438 changes than repeated ones from a goal-directed behaviour perspective. We used this  
439 task structure to reveal the precise roles of noradrenergic and dopaminergic neurons  
440 in encoding motivation to engage in the task and in signalling task state changes. We  
441 used the engagement in a task condition on a specific trial as a measure of motivation  
442 and found that both noradrenergic and dopaminergic neurons' activities were  
443 predictive of the engagement. Their activities were not only correlated with the session-  
444 average probability to engage in a particular task condition, but also with the trial-by-  
445 trial engagement. Furthermore, their activities were correlated with engagement over  
446 and above the specific task condition. This strengthens the role of both  
447 catecholaminergic systems in motivating effortful, reward directed actions.

448 However, the activity of noradrenergic and dopaminergic neurons differed significantly  
449 when it came to signalling task state changes. First, only noradrenergic neurons'

450 activity was sensitive to whether or not the visual cue was providing information about  
451 the new task state (which was the case only in non-repeated trials), over and above its  
452 relation with upcoming reward and effort levels. Moreover, noradrenergic, but not  
453 dopaminergic, neurons displayed activity after a fixation break, which ended the trial  
454 and represented a failure to engage. This activity scaled with the probability of  
455 engagement given the task condition and it was positively correlated with the  
456 engagement in the next trial. Hence, noradrenaline, contrary to dopamine, plays a role  
457 both in signalling information about task state and in promoting current and future  
458 effortful actions given this information.

459 *Similarities and dissimilarities of the role of the catecholaminergic systems in*  
460 *motivation*

461 This study builds on experiments presented in Varazzani et al (2015), but here includes  
462 both repeated and non-repeated, and correct and incorrect trials, rather than just the  
463 non-repeated correct trials reported in Varazzani et al (2015). This allowed us to  
464 examine the influence of information about task state changes and motivation to  
465 engage, and not just the cost-benefit parameters of the presented cues, on neural  
466 activity. The inclusion of these additional trials did lead to slight differences in the  
467 strength of encoding of task parameters to those reported previously. However,  
468 importantly the overall pattern of effects was comparable, and any differences were  
469 negligible compared to the difference in terms of sensitivity in noradrenaline and  
470 dopamine neurons to changes in task state.

471 Both noradrenergic and dopaminergic neurons' activity was related to the engagement  
472 in the effortful actions. Dopaminergic neurons' activity was tightly linked with the

473 engagement in the rewarded course of action independently of whether the trial was  
474 repeated or not. Dopaminergic neurons were also activated at the time of producing  
475 the action, but contrary to noradrenergic neurons, they did not correlate with the actual  
476 force produced (Varazzani et al. 2015). The causal role of dopamine in incentive  
477 processes has been shown in different species, with an emphasis on its role in  
478 controlling reward sensitivity (Denk et al. 2005; Hoskins et al. 2014; Le Bouc et al.  
479 2016; Yohn et al. 2016; Zénon et al. 2016; Noritake et al, 2018). Moreover, our results  
480 are in line with studies demonstrating that dopamine release is strongly driven by the  
481 initiation of a purposeful action for reward (Phillips et al. 2003; Roitman et al., 2004;  
482 Syed et al. 2016).

483 Noradrenergic neurons' activity was also linked to the engagement in the effortful  
484 course of action as well as to the actual production of the action (Varazzani et al.,  
485 2015). This is in line with previous demonstrations that LC neurons respond to stimuli  
486 predicting future rewards and action initiation responses (Bouret & Sara, 2004; Bouret  
487 & Richmond 2009, 2015; Kalwani et al. 2014). Contrary to dopamine, causal  
488 manipulation of the noradrenergic system does not seem to affect incentive processes  
489 (Hoskins et al. 2014; Jahn et al. 2018). Indeed, our recent study showed that the  
490 noradrenergic system controls the amount of force produced during the action, but not  
491 the selection nor the initiation of the action (Jahn et al. 2018). Hence, the noradrenergic  
492 system might be critical to ensure that the effortful action is appropriately performed  
493 once a decision to engage has been taken (Bouret & Richmond 2015; Varazzani et al.  
494 2015), whereas dopamine is instead key for signalling the subjective future reward to  
495 be gained by performing an action and promoting that response (Ishiwari et al., 2004;



496 Gan et al. 2010; Pasquereau & Turner 2013; Varazzani et al. 2015; Papageorgiou et  
497 al., 2016; Salamone et al. 2016).

498 *Why are dopaminergic neurons not sensitive to the information about task state*  
499 *change in our task?*

500 Dopamine neurons have long been reported to respond to salient novel stimuli  
501 (Strecker & Jacobs 1985; Ljunberg et al. 1992; Horvitz et al. 1997; Menegas et al.  
502 2017) and to be implicated in novelty seeking (Costa et al. 2014). Therefore, it may  
503 initially seem surprising that in our task, dopaminergic neurons were not sensitive to  
504 the novelty of the presented task condition information. However, there are a number  
505 of important differences between these experiments and the current one. For instance,  
506 in previous experiments examining novelty seeking, it is unclear whether dopaminergic  
507 neurons are encoding new information based on the change in uncertainty about the  
508 world, independent of choice, or as a variable driving the behaviour. While Bromberg-  
509 Martin and Hikosaka showed that dopaminergic neurons were sensitive to the  
510 advanced information about the size of the reward, importantly in their study, monkeys  
511 showed a preference for obtaining this information, implying that it was therefore  
512 relevant for guiding the behaviour (Bromberg-Martin & Hikosaka 2009; Charpentier et  
513 al. 2018). In another experiment, Naudé and colleagues showed that mice preferred a  
514 probabilistic outcome to a deterministic outcome, and that this preference was  
515 controlled by the dopaminergic system (Naudé et al. 2016). These two studies show  
516 that dopaminergic neurons are sensitive to information as a variable that can influence  
517 choices through preferences, since it acted as a reward (Charpentier et al. 2018). In  
518 our task, as the cost-benefit cues were all well known, information (as provided by the

519 cues in non-repeated, but not in repeated trials) would neither cause sensory surprise  
520 (as cues themselves were not novel) nor be relevant for modulating future choices.  
521 Therefore, although we cannot rule out that some individual dopamine neurons do  
522 code for this factor, it seems that dopamine neurons as a population do not encode  
523 the information about task state changes when this is not relevant to guide the  
524 behaviour.

525 *Noradrenergic neurons' activity reflects the role of noradrenaline in information*  
526 *processing and engagement after a failure*

527 The crucial difference between dopaminergic and noradrenergic neurons was that  
528 noradrenergic neurons were sensitive to the repetition of a trial at cue. Because task  
529 state changes only occur after a successful trial, lower activation of LC neurons at cue  
530 on repeated trials could reflect the fact that an error just occurred. However, we found  
531 no significant effect of error on the previous trial in baseline activity before the cue.  
532 Therefore, it is unlikely that there is a carry-over effect of error on the next trial. This  
533 lower activation in repeated trials could also be simply due to the repetition of a visual  
534 cue. However, there was no significant difference in the sensitivity to the task factors  
535 (effort and reward levels) in repeated and non-repeated trials. Hence, there is no  
536 evidence in our data for a simple stimulus repetition suppression effect. Moreover, from  
537 a goal directed behavior perspective, there is much more likely to be a state transition  
538 after a sequence ended with a reward, which would argue against a simple cue  
539 repetition response. Therefore, we attributed this lower activation to the fact that the  
540 monkeys already knew the task condition in repeated trials. Noradrenergic neurons  
541 would be sensitive to the information about task state changes, which corresponds to

542 the discovery of a new state of the world either at the time of cue (i.e., which task  
543 condition has been selected for the current trial) but also at fixation break (an error  
544 means that the trial is terminated and that the same task condition is coming next). This  
545 is in line with the long-stated, if underspecified, role of noradrenaline in signalling  
546 important events in the environment (Kety 1972; Foote et al. 1980; Aston-Jones &  
547 Bloom 1981; Abercrombie & Jacobs 1987; Berridge & Waterhouse 2003; Vazey et al.  
548 2018). Noradrenaline has been implicated in signalling a need to provoke or facilitate  
549 a cognitive shift to adapt to the environment (Bouret & Sara 2005; Yu & Dayan 2005;  
550 Glennon et al. 2019). Here, noradrenergic neurons' sensitivity to change in task state  
551 at the time of cue could reflect a need to process the information about the current task  
552 condition.

553 Crucially, only noradrenergic neurons were activated following a break in fixation,  
554 which represents a failure to engage in the effortful action. Similar patterns of activity  
555 at the break of fixation have also been observed in mid-cingulate cortex (MCC), here  
556 modulated by how close to reward delivery the error occurred or how much effort was  
557 already invested in the task (Amiez et al. 2005). Given the connections between LC  
558 and MCC, this suggests that MCC and LC might well interact when required to signal  
559 salient events. A break of fixation was an important event not only as it signalled the  
560 end of the trial, but also the re-occurrence of same task condition in the next one. This  
561 post-fixation break activity was tightly linked to firing rates at the time of cue, which in  
562 turn reflected the probability of engagement in the effortful action. A potential scenario  
563 is that if the activity at the cue was too small to enable maintenance of the fixation and  
564 the engagement in the trial, then activity at the fixation break reflects a prospective  
565 update to enable performance of the action on the subsequent trial. Indeed, we found

566 that when we controlled for task condition, noradrenaline neurons were more active  
567 after fixation break when monkeys then engaged in the subsequent trial. Finally, as we  
568 were never able to predict the engagement in the trial from the baseline activity at the  
569 cue, even for repeated trials and even for trials following a fixation break, we only  
570 conclude that noradrenergic neurons predict the engagement on a trial-by-trial basis  
571 but have no evidence that they do so through a slow fluctuation of activity that lasts  
572 beyond the range of a trial.

573 Together, these results are compatible with the idea that noradrenergic neurons signal  
574 and potentially facilitate the need to engage resources to undertake and complete  
575 effortful actions (Bouret et al. 2012; Walton & Bouret 2019). In both cases, they do it  
576 as a function of new information about the state of the world: about the start of a new  
577 and unpredictable experimental condition that will bring a reward at the cue, and about  
578 the failure to complete a trial that might have been worth it, since they re-engage  
579 immediately at fixation break.

580 To conclude, our data show the specific and complementary roles of dopamine and  
581 noradrenaline in motivation and behavioural flexibility. The former would promote  
582 actions directed towards currently available rewards, while the latter could play a  
583 critical role in facing challenging situations by mobilizing resources based on new  
584 information about the environment.

## 585 **Materials and Methods**

### 586 *Monkeys*

587 Three male rhesus monkeys (Monkey D, 11 kg, 5 years old; Monkey E, 7.5 kg, 4 years  
588 old; Monkey A, 10 kg, 4 years old) were used as subjects for the experiments. During  
589 testing days (Monday to Friday), they received all their water as reward on testing days  
590 and they received water according to their physiological needs on non-testing days. All  
591 experimental procedures were designed in association with the Institut du Cerveau et  
592 de la Moelle Epiniere (ICM) veterinarians, approved by the Regional Ethical Committee  
593 for Animal Experiment (CREEA IDF no. 3) and performed in compliance with the  
594 European Community Council Directives (86/609/EEC).

### 595 *Task*

596 The behavioural paradigm has previously been described in detail in Varazzani et al.  
597 (2015). In brief, each monkey sat in a primate chair positioned in front of a monitor on  
598 which visual stimuli were displayed. A pneumatic grip (M2E Unimecanique, Paris,  
599 France) was mounted on the chair at the level of the monkey's hands. Water rewards  
600 were delivered from a tube positioned between the monkey's lips. Behavioural  
601 paradigm was controlled using the REX system (NIH, MD, USA) and Presentation  
602 software (Neurobehavioral systems, Inc, CA, USA).

603 The task consisted of squeezing the grip to a minimum imposed force threshold to  
604 obtain rewards, delivered at the end of each successful squeeze (fig 1A and B). At the  
605 beginning of each trial, subject had to fixate a red dot at the centre of the screen before  
606 a cue appeared. The cue indicated the minimum amount of force to produce to obtain

607 the reward (3 force levels) and the amount of reward at stake (3 reward levels: 1, 2  
608 and 4 drops of water). After a variable delay (1500±500ms from cue display), the dot  
609 at the centre of the cue turned green (Go signal) and subject had 1000ms to initiate  
610 the action, meaning squeezing the clamp very little (threshold set to detect any attempt  
611 to perform the action). If the monkey reached the minimum force threshold indicated  
612 by the cue, the dot turned blue and remained blue if the effort was sustained for  
613 500±100ms. At the end of this period, if at least the minimum required effort had been  
614 maintained, the water reward was delivered.

615 Fixation of the central dot had to be maintained through the different phases of the  
616 task. A trial was incorrect if: (i) the monkey broke fixation before the reward delivery,  
617 (ii) he squeezed the clamp before the go signal, (iii) he failed to squeeze the clamp at  
618 all or (iv) at the minimum force threshold or (v) didn't maintain the effort long enough.  
619 After an error the same trial was repeated until it was successfully completed. Within  
620 a session, the nine combinations of effort and reward conditions were selected with  
621 equal probability and presented in a random order. As erroneous trials were repeated,  
622 the policy with the highest reward rate was to always engage until satiety.

623 Monkeys were trained for several months on this task. They first learned to distinguish  
624 and perform two different force levels and the difficulty of the task was progressively  
625 increased until they were could do so with the nine experimental conditions. Finally,  
626 they learned that they had to fixate the central dot to go through a trial.

### 627 *Electrophysiological recordings*

628 Single unit recording using vertically movable single electrodes was carried out using  
629 conventional techniques. The electrophysiological signals were acquired, amplified

630 (x10,000), digitized, and band-pass filtered (100 Hz to 2 kHz) using the OmniPlex  
631 system (Plexon). Precise description of the recording procedures can be found in the  
632 article where LC and SNc/VTA data used here were originally reported (Varazzani et  
633 al. 2015). Noradrenergic neurons recordings were performed on monkey A (29  
634 neurons in 15 sessions) and monkey D (63 neurons in 38 sessions), midbrain  
635 dopaminergic neurons recordings were performed on monkey D (56 neurons in 38  
636 sessions, sometimes simultaneously as noradrenergic neurons recordings) and  
637 monkey E (28 neurons in 19 sessions).

### 638 *Data analysis*

639 Data were analysed with Matlab software (MathWorks). Figures represent data  $\pm$   
640 standard deviation to the mean.

641 In all our analyses we only considered trials (correct and incorrect) in which monkeys  
642 did not break the fixation before the onset of the cue (NA: 324 trials on average for  
643 monkey A and 281 for monkey D, DA: 314 trials on average for monkey D and 274 for  
644 monkey E). We took all those trials and computed the probability that for a given effort  
645 and reward level (or a given task condition), subjects would engage with the trial. We  
646 considered that monkeys engaged if they maintained fixation throughout the trial and  
647 initiated the action even if it occurred before the Go signal, (5% of trials in both  
648 noradrenergic (NA) and dopaminergic (DA) neurons recording sessions), not strongly  
649 (0% and 0.1% of trials in NA and DA sessions respectively) or long enough (8% and  
650 10% of trials in NA and DA sessions respectively). Although it was possible to fail to  
651 engage with a trial by maintaining fixation but not squeezing the clamp, this type of  
652 mistake was rare (2% and 1% of trials in NA and DA sessions respectively) and

653 monkeys mostly rejected a trial by breaking fixation (20% of all trials in both NA and  
654 DA sessions). Erroneous trials were therefore mainly of two types: i) monkeys broke  
655 the fixation and failed to engage with the trial (*no engagement* and *no new information*  
656 as the same trial type is presented again: 20% of all trials in both NA and DA sessions)  
657 and ii) monkeys engaged (tried to squeeze the clamp) but did not complete the correct  
658 action (*engagement* but *no new information*: 17% and 20% of engaged trials, which  
659 corresponds to 13% and 15% of all trials in NA and DA sessions respectively).

660 We examined the effects of effort, reward and trial number on the engagement in the  
661 action using a multi-level logistic regression for each session. The three variables were  
662 z-scored so that we could compare their weights across sessions. We then went on to  
663 examine task conditions influenced neuronal activity. To assess the effect of task  
664 conditions on neurons' activity at the time of cue onset, we used a window from 0 to  
665 500ms from cue onset. When we looked at these effects in the pre-cue period, we  
666 used a window from -500 to 0ms from cue onset. Neurons' activity was measured in  
667 firing rates (spikes per second) and were z-scored for each session to compare  
668 the activity across neurons. First, the effects of the task factors: effort, reward and trial  
669 number in a session on neurons' activity were estimated using a multi-level linear  
670 regression for each neuron. Second, we assessed the relationship between neurons'  
671 firing rates and engagement in a given trial by running a logistic regression of neurons'  
672 firing rates on engagement. Finally, we looked at the linear encoding of the z-scored  
673 probability to engage given the task condition on neurons' firing rates using a linear  
674 regression.

675 When we looked at the effect of the novelty of the trial state (here referred to as "task  
676 state change") on neuronal activity, we first looked at whether the fact that a cue was



677 informative ( $I=1$ ) or not ( $I=0$ ) changed the sensitivity of neurons for the task factor (E,  
678 R, N) at the time cue by regressing the task factors and the interaction between the  
679 task factors and the informativity ( $I=0$  or 1) onto the trial-by-trial neurons' activity. A  
680 significant interaction would mean that an informative cue (signalling the new task  
681 state) would increase or decrease the sensitivity for the task factor. We then wanted to  
682 assess the conjoint effect of engagement and task state change on neurons' firing  
683 rates above and beyond the effect of effort and reward levels. To do so, we ran a multi-  
684 level linear regression taking into account the task condition variability. In other words,  
685 we removed from neurons' firing rates the effect of the task condition using a mixed  
686 model:

$$687 \quad \text{Neurons' firing rates} = \beta_0 + \beta_0(\text{task condition}) + \sum_i \beta_i \cdot x_i$$

688 where  $\beta_0$  a constant,  $\beta_0(\text{task condition})$  a constant fitted for each combination of effort  
689 and reward level (9 possibilities),  $x_i$  the experimental factors and  $\beta_i$  their weights in the  
690 linear regression (e.g. engagement, task state change, interaction). When looking at  
691 the effect of engagement and task state change at cue, we tested the following  
692 experimental factors: engagement, task state change and interaction between effect.  
693 We then added to the regression the following confounds: trial number, interaction  
694 between trial number and engagement and interaction between trial number and task  
695 state change. All results hold when adding the confounds.

696 We then moved on to assess whether noradrenergic and dopaminergic neurons were  
697 activated before the fixation break. We only considered fixation breaks that occurred  
698 after the display of the cue. We compared firing rates from 600ms before the fixation  
699 break to 300ms after (in 300ms windows). For all analyses at fixation break, we only

700 included sessions during which there were more than 20 fixation break events after  
701 the onset of the cue (91 % of NA sessions and 89 % of DA sessions). Delays between  
702 the onset of the cues and fixation break events followed a Poisson-like distribution of  
703 median 845ms for NA session and 713ms for DA sessions (statistically different, t-test  
704 on the mean of the log-transformed distributions:  $p < 0.001$ ). To ensure that the activity  
705 at the fixation break was not contaminated by the cue response, we also looked only  
706 at fixation break events that occurred at least 500ms after the cue onset (83 % of NA  
707 sessions and 75 % of DA sessions). However, all main results were similar both with  
708 and without exclusion of the early fixation break events. To assess whether neurons  
709 were activated at the fixation break, we compared the difference in firing rate before  
710 and after the fixation break and the % of change in firing rate (by dividing by the firing  
711 rate before the fixation break). We ran a similar analysis to assess whether neurons  
712 were activated before the fixation break. When looking at the modulation of the evoked  
713 activity a fixation break, we used the same methodological approach as for the analysis  
714 of activity at cue onset. When looking at the effect of engagement in the next trial at  
715 fixation break cue, we tested the following experimental factors: engagement in the  
716 next trial. We then added to the regression the following confounds: task state change  
717 (in the current trial), trial number, interaction between the effect of engagement in the  
718 next trial and task state change and interaction between the effect of engagement in  
719 the next trial and trial number. All results hold when adding the confounds. To assess  
720 the size of the effect of engagement in the next trial, we ran the linear regression of  
721 the effect of engaging in the next trial while taking into account the task condition on  
722 the non-z-scored firing rate of neurons at fixation break and divided the regression  
723 coefficient (difference between engage and non-engage conditions) by the fixed

724 intercept (mean firing rate across both conditions).

725 Second-level analyses were performed by comparing the distributions of regression  
726 coefficients against zero or other distributions (paired t-test and unpaired t-test  
727 respectively or ANOVA). Statistical reports include means of the distribution  $\pm$  standard  
728 deviation to the mean, t-values or F-values and p-values.

729 **Conflict of interest**

730 The authors declare no competing financial interest.

731

732 **Acknowledgments**

733

734 This research was funded by the ERC BIOMOTIV, the Paris Descartes University  
735 doctoral and mobility grants and the Wellcome Trust fellowships (MEW:  
736 202831/Z/16/Z, JS: 105651/Z/14/Z). The Wellcome Centre for Integrative  
737 Neuroimaging is supported by core funding from the Wellcome Trust (203139/Z/16/Z).

738 **References**

- 739 1. Abercrombie ED, Jacobs BL. Single-unit response of noradrenergic neurons in  
740 the locus coeruleus of freely moving cats. I. Acutely presented stressful and  
741 nonstressful stimuli. *J Neurosci*. 1987 Sep 1;7(9):2837–43.
- 742 2. Amiez C, Joseph J-P, Procyk E. Anterior cingulate error-related activity is  
743 modulated by predicted reward. *Eur J Neurosci*. 2005 Jun;21(12):3447–52.
- 744 3. Aston-Jones G, Bloom FE. Nonrepinephrine-containing locus coeruleus neurons  
745 in behaving rats exhibit pronounced responses to non-noxious environmental  
746 stimuli. *J Neurosci*. 1981 Aug 1;1(8):887–900.
- 747 4. Aston-Jones G, Cohen JD. An integrative theory of locus coeruleus-  
748 norepinephrine function: adaptive gain and optimal performance. *Annu Rev*  
749 *Neurosci*. 2005;28:403–50.
- 750 5. Berridge CW, Waterhouse BD. The locus coeruleus-noradrenergic system:  
751 modulation of behavioral state and state-dependent cognitive processes. *Brain*  
752 *Res Brain Res Rev*. 2003 Apr;42(1):33–84.
- 753 6. Berridge KC. The debate over dopamine's role in reward: the case for incentive  
754 salience. *Psychopharmacology*. 2007 Apr 1;191(3):391–431.
- 755 7. Boorman ED, Rushworth MF, Behrens TE. Ventromedial Prefrontal and Anterior  
756 Cingulate Cortex Adopt Choice and Default Reference Frames during  
757 Sequential Multi-Alternative Choice. *J Neurosci*. 2013 Feb 6;33(6):2242–53.
- 758 8. Bouret S, Richmond BJ. Relation of Locus Coeruleus Neurons in Monkeys to  
759 Pavlovian and Operant Behaviors. *Journal of Neurophysiology*. 2009 Feb  
760 1;101(2):898–911.
- 761 9. Bouret S, Richmond BJ. Sensitivity of Locus Ceruleus Neurons to Reward Value  
762 for Goal-Directed Actions. *J Neurosci*. 2015 Mar 4;35(9):4005–14.
- 763 10. Bouret S, Richmond BJ, Ravel S. Complementary neural correlates of  
764 motivation in dopaminergic and noradrenergic neurons of monkeys. *Front Behav*  
765 *Neurosci* [Internet]. 2012 [cited 2018 Mar 16];6.
- 766 11. Bouret S, Sara SJ. Reward expectation, orientation of attention and locus  
767 coeruleus-medial frontal cortex interplay during learning. *European Journal of*  
768 *Neuroscience*. 2004 Aug 1;20(3):791–802.
- 769 12. Bouret S, Sara SJ. Network reset: a simplified overarching theory of locus  
770 coeruleus noradrenaline function. *Trends Neurosci*. 2005 Nov;28(11):574–82.
- 771 13. Bromberg-Martin ES, Hikosaka O. Midbrain Dopamine Neurons Signal  
772 Preference for Advance Information about Upcoming Rewards. *Neuron*. 2009  
773 Jul 16;63(1):119–26.

- 774 14. Bromberg-Martin ES, Matsumoto M, Hikosaka O. Dopamine in motivational  
775 control: rewarding, aversive, and alerting. *Neuron*. 2010 Dec 9;68(5):815–34.
- 776 15. Chamberlain SR, Müller U, Blackwell AD, Clark L, Robbins TW, Sahakian BJ.  
777 Neurochemical Modulation of Response Inhibition and Probabilistic Learning in  
778 Humans. *Science*. 2006 Feb 10;311(5762):861–3.
- 779 16. Charpentier CJ, Bromberg-Martin ES, Sharot T. Valuation of knowledge and  
780 ignorance in mesolimbic reward circuitry. *PNAS*. 2018 Jul 31;115(31):E7255–64.
- 781 17. Costa VD, Tran VL, Turchi J, Averbeck BB. Dopamine modulates novelty  
782 seeking behavior during decision making. *Behav Neurosci*. 2014  
783 Oct;128(5):556–66.
- 784 18. Dalley JW, McGaughy J, O’Connell MT, Cardinal RN, Levita L, Robbins TW.  
785 Distinct changes in cortical acetylcholine and noradrenaline efflux during  
786 contingent and noncontingent performance of a visual attentional task. *J*  
787 *Neurosci*. 2001 Jul 1;21(13):4908–14.
- 788 19. Dayan P, Yu AJ. Phasic norepinephrine: A neural interrupt signal for unexpected  
789 events. *Network: Computation in Neural Systems*. 2006 Jan 1;17(4):335–50.
- 790 20. Denk F, Walton ME, Jennings KA, Sharp T, Rushworth MFS, Bannerman DM.  
791 Differential involvement of serotonin and dopamine systems in cost-benefit  
792 decisions about delay or effort. *Psychopharmacology (Berl)*. 2005  
793 May;179(3):587–96.
- 794 21. Devauges V, Sara SJ. Activation of the noradrenergic system facilitates an  
795 attentional shift in the rat. *Behav Brain Res*. 1990 Jun;39(1):19–28.
- 796 22. Doya K. Modulators of decision making. *Nature Neuroscience*. 2008  
797 Apr;11(4):410–6.
- 798 23. Einhäuser W, Stout J, Koch C, Carter O. Pupil dilation reflects perceptual  
799 selection and predicts subsequent stability in perceptual rivalry. *Proc Natl Acad*  
800 *Sci USA*. 2008 Feb 5;105(5):1704–9.
- 801 24. Foote SL, Aston-Jones G, Bloom FE. Impulse activity of locus coeruleus  
802 neurons in awake rats and monkeys is a function of sensory stimulation and  
803 arousal. *PNAS*. 1980 May 1;77(5):3033–7.
- 804 25. Gan JO, Walton ME, Phillips PEM. Dissociable cost and benefit encoding of  
805 future rewards by mesolimbic dopamine. *Nature Neuroscience*. 2010  
806 Jan;13(1):25–7.
- 807 26. Glennon E, Carcea I, Martins ARO, Multani J, Shehu I, Svirsky MA, et al. Locus  
808 coeruleus activation accelerates perceptual learning. *Brain Res*. 2019 Apr  
809 15;1709:39–49.

- 810 27. Grant SJ, Aston-Jones G, Redmond DE. Responses of primate locus coeruleus  
811 neurons to simple and complex sensory stimuli. *Brain Res Bull.* 1988  
812 Sep;21(3):401–10.
- 813 28. Horvitz JC, Stewart T, Jacobs BL. Burst activity of ventral tegmental dopamine  
814 neurons is elicited by sensory stimuli in the awake cat. *Brain Res.* 1997 Jun  
815 13;759(2):251–8.
- 816 29. Hosking JG, Floresco SB, Winstanley CA. Dopamine antagonism decreases  
817 willingness to expend physical, but not cognitive, effort: a comparison of two  
818 rodent cost/benefit decision-making tasks. *Neuropsychopharmacology.* 2015  
819 Mar;40(4):1005–15.
- 820 30. Ishiwari K, Weber SM, Mingote S, Correa M, Salamone JD. Accumbens  
821 dopamine and the regulation of effort in food-seeking behavior: modulation of  
822 work output by different ratio or force requirements. *Behav Brain Res.* 2004 May  
823 5;151(1–2):83–91.
- 824 31. Jahn CI, Gilardeau S, Varazzani C, Blain B, Sallet J, Walton ME, et al. Dual  
825 contributions of noradrenaline to behavioural flexibility and motivation.  
826 *Psychopharmacology (Berl).* 2018 Sep;235(9):2687–702.
- 827 32. Jepma M, Brown SBRE, Murphy PR, Koelewijn SC, de Vries B, van den  
828 Maagdenberg AM, et al. Noradrenergic and Cholinergic Modulation of Belief  
829 Updating. *J Cogn Neurosci.* 2018 Jul 31;1–18.
- 830 33. Kalwani RM, Joshi S, Gold JI. Phasic Activation of Individual Neurons in the  
831 Locus Ceruleus/Subceruleus Complex of Monkeys Reflects Rewarded  
832 Decisions to Go But Not Stop. *J Neurosci.* 2014 Oct 8;34(41):13656–69.
- 833 34. Kawagoe R, Takikawa Y, Hikosaka O. Reward-Predicting Activity of Dopamine  
834 and Caudate Neurons—A Possible Mechanism of Motivational Control of  
835 Saccadic Eye Movement. *Journal of Neurophysiology.* 2004 Feb 1;91(2):1013–  
836 24.
- 837 35. Kety SS. The possible role of the adrenergic systems of the cortex in learning.  
838 *Res Publ Assoc Res Nerv Ment Dis.* 1972;50:376–89.
- 839 36. Kolling N, Behrens TEJ, Mars RB, Rushworth MFS. Neural Mechanisms of  
840 Foraging. *Science.* 2012 Apr 6;336(6077):95–8.
- 841 37. Le Bouc R, Rigoux L, Schmidt L, Degos B, Welter M-L, Vidailhet M, et al.  
842 Computational Dissection of Dopamine Motor and Motivational Functions in  
843 Humans. *J Neurosci.* 2016 Jun 22;36(25):6623–33.
- 844 38. Ljungberg T, Apicella P, Schultz W. Responses of monkey dopamine neurons  
845 during learning of behavioral reactions. *J Neurophysiol.* 1992 Jan;67(1):145–63.
- 846 39. Matsumoto M, Hikosaka O. Two types of dopamine neuron distinctly convey  
847 positive and negative motivational signals. *Nature.* 2009 Jun;459(7248):837–41.

- 848 40. McGaughy J, Ross RS, Eichenbaum H. Noradrenergic, but not cholinergic,  
849 deafferentation of prefrontal cortex impairs attentional set-shifting.  
850 *Neuroscience*. 2008 Apr 22;153(1):63–71.
- 851 41. Menegas W, Babayan BM, Uchida N, Watabe-Uchida M. Opposite initialization  
852 to novel cues in dopamine signaling in ventral and posterior striatum in mice.  
853 *Elife*. 2017 05;6.
- 854 42. Minamimoto T, La Camera G, Richmond BJ. Measuring and Modeling the  
855 Interaction Among Reward Size, Delay to Reward, and Satiating Level on  
856 Motivation in Monkeys. *Journal of Neurophysiology*. 2009 Jan 1;101(1):437–47.
- 857 43. Muller TH, Mars RB, Behrens TE, O'Reilly JX. Control of entropy in neural  
858 models of environmental state. *Elife*. 2019 Feb 28;8.
- 859 44. Nassar MR, Rumsey KM, Wilson RC, Parikh K, Heasly B, Gold JI. Rational  
860 regulation of learning dynamics by pupil-linked arousal systems. *Nat Neurosci*.  
861 2012 Jun 3;15(7):1040–6.
- 862 45. Naudé J, Tolu S, Dongelmans M, Torquet N, Valverde S, Rodriguez G, et al.  
863 Nicotinic receptors in the ventral tegmental area promote uncertainty-seeking.  
864 *Nature Neuroscience*. 2016 Mar;19(3):471.
- 865 46. Nicola SM. The Flexible Approach Hypothesis: Unification of Effort and Cue-  
866 Responding Hypotheses for the Role of Nucleus Accumbens Dopamine in the  
867 Activation of Reward-Seeking Behavior. *J Neurosci*. 2010 Dec 8;30(49):16585–  
868 600.
- 869 47. Nomoto K, Schultz W, Watanabe T, Sakagami M. Temporally Extended  
870 Dopamine Responses to Perceptually Demanding Reward-Predictive Stimuli. *J*  
871 *Neurosci*. 2010 Aug 11;30(32):10692–702.
- 872 48. Noritake A, Ninomiya T, Isoda M. Social reward monitoring and valuation in the  
873 macaque brain. *Nat Neurosci*. 2018 Oct;21(10):1452–62.
- 874 49. Papageorgiou GK, Baudonnat M, Cucca F, Walton ME. Mesolimbic Dopamine  
875 Encodes Prediction Errors in a State-Dependent Manner. *Cell Rep*. 2016 Apr  
876 12;15(2):221–8.
- 877 50. Pasquereau B, Turner RS. Limited encoding of effort by dopamine neurons in a  
878 cost-benefit trade-off task. *J Neurosci*. 2013 May 8;33(19):8288–300.
- 879 51. Phillips PEM, Stuber GD, Heien MLAV, Wightman RM, Carelli RM. Subsecond  
880 dopamine release promotes cocaine seeking. *Nature*. 2003 Apr;422(6932):614–  
881 8.
- 882 52. Rajkowski J, Majczynski H, Clayton E, Aston-Jones G. Activation of monkey  
883 locus coeruleus neurons varies with difficulty and performance in a target  
884 detection task. *J Neurophysiol*. 2004 Jul;92(1):361–71.



- 885 53. Ravel S, Richmond BJ. Dopamine neuronal responses in monkeys performing  
886 visually cued reward schedules. *European Journal of Neuroscience*. 2006 Jul  
887 1;24(1):277–90.
- 888 54. Robbins TW, Arnsten AFT. The Neuropsychopharmacology of Fronto-Executive  
889 Function: Monoaminergic Modulation. *Annual Review of Neuroscience*.  
890 2009;32(1):267–87.
- 891 55. Robbins TW, Everitt BJ. A role for mesencephalic dopamine in activation:  
892 commentary on Berridge (2006). *Psychopharmacology*. 2007 Apr 1;191(3):433–  
893 7.
- 894 56. Robbins TW, Roberts AC. Differential Regulation of Fronto-Executive Function  
895 by the Monoamines and Acetylcholine. *Cereb Cortex*. 2007 Sep  
896 1;17(suppl\_1):i151–60.
- 897 57. Roitman MF, Stuber GD, Phillips PEM, Wightman RM, Carelli RM. Dopamine  
898 Operates as a Subsecond Modulator of Food Seeking. *J Neurosci*. 2004 Feb  
899 11;24(6):1265–71.
- 900 58. Salamone JD, Yohn SE, López-Cruz L, San Miguel N, Correa M. Activational  
901 and effort-related aspects of motivation: neural mechanisms and implications for  
902 psychopathology. *Brain*. 2016 May;139(Pt 5):1325–47.
- 903 59. Sara SJ, Segal M. Plasticity of sensory responses of locus coeruleus neurons in  
904 the behaving rat: implications for cognition. *Prog Brain Res*. 1991;88:571–85.
- 905 60. Sara SJ. The locus coeruleus and noradrenergic modulation of cognition. *Nature*  
906 *Reviews Neuroscience*. 2009 Mar;10(3):211–23.
- 907 61. Sara SJ, Bouret S. Orienting and Reorienting: The Locus Coeruleus Mediates  
908 Cognition through Arousal. *Neuron*. 2012 Oct 4;76(1):130–41.
- 909 62. Schultz W. Predictive Reward Signal of Dopamine Neurons. *Journal of*  
910 *Neurophysiology*. 1998 Jul 1;80(1):1–27.
- 911 63. Stoll FM, Fontanier V, Procyk E. Specific frontal neural dynamics contribute to  
912 decisions to check. *Nature Communications*. 2016 Jun 20;7:11990.
- 913 64. Strecker RE, Jacobs BL. Substantia nigra dopaminergic unit activity in behaving  
914 cats: effect of arousal on spontaneous discharge and sensory evoked activity.  
915 *Brain Res*. 1985 Dec 30;361(1–2):339–50.
- 916 65. Swick D, Pineda JA, Schacher S, Foote SL. Locus coeruleus neuronal activity in  
917 awake monkeys: relationship to auditory P300-like potentials and spontaneous  
918 EEG. *Exp Brain Res*. 1994;101(1):86–92.
- 919 66. Syed ECJ, Grima LL, Magill PJ, Bogacz R, Brown P, Walton ME. Action  
920 initiation shapes mesolimbic dopamine encoding of future rewards. *Nature*  
921 *Neuroscience*. 2016 Jan;19(1):34–6.

- 922 67. Tait DS, Brown VJ, Farovik A, Theobald DE, Dalley JW, Robbins TW. Lesions of  
923 the dorsal noradrenergic bundle impair attentional set-shifting in the rat.  
924 *European Journal of Neuroscience*. 2007 Jun 1;25(12):3719–24.
- 925 68. Takikawa Y, Kawagoe R, Hikosaka O. A Possible Role of Midbrain Dopamine  
926 Neurons in Short- and Long-Term Adaptation of Saccades to Position-Reward  
927 Mapping. *Journal of Neurophysiology*. 2004 Oct 1;92(4):2520–9.
- 928 69. Tervo DGR, Proskurin M, Manakov M, Kabra M, Vollmer A, Branson K, et al.  
929 Behavioral variability through stochastic choice and its gating by anterior  
930 cingulate cortex. *Cell*. 2014 Sep 25;159(1):21–32.
- 931 70. Urai AE, Braun A, Donner TH. Pupil-linked arousal is driven by decision  
932 uncertainty and alters serial choice bias. *Nature Communications*. 2017 Mar  
933 3;8:14637.
- 934 71. Vankov A, Hervé-Minvielle A, Sara SJ. Response to Novelty and its Rapid  
935 Habituation in Locus Coeruleus Neurons of the Freely Exploring Rat. *European*  
936 *Journal of Neuroscience*. 1995 Jun 1;7(6):1180–7.
- 937 72. Varazzani C, San-Galli A, Gilardeau S, Bouret S. Noradrenaline and dopamine  
938 neurons in the reward/effort trade-off: a direct electrophysiological comparison in  
939 behaving monkeys. *J Neurosci*. 2015 May 20;35(20):7866–77.
- 940 73. Vazey EM, Moorman DE, Aston-Jones G. Phasic locus coeruleus activity  
941 regulates cortical encoding of salience information. *Proc Natl Acad Sci USA*.  
942 2018 02;115(40):E9439–48.
- 943 74. Ventura R, Morrone C, Puglisi-Allegra S. Prefrontal/accumbal catecholamine  
944 system determines motivational salience attribution to both reward- and  
945 aversion-related stimuli. *PNAS*. 2007 Mar 20;104(12):5181–6.
- 946 75. Walton ME, Bouret S. What Is the Relationship between Dopamine and Effort?  
947 *Trends in Neurosciences*. 2019 Feb 1;42(2):79–91.
- 948 76. Ye Z, Altena E, Nombela C, Housden CR, Maxwell H, Rittman T, et al.  
949 Improving Response Inhibition in Parkinson’s Disease with Atomoxetine.  
950 *Biological Psychiatry*. 2015 Apr 15;77(8):740–8.
- 951 77. Yohn SE, Errante EE, Rosenbloom-Snow A, Somerville M, Rowland M, Tokarski  
952 K, et al. Blockade of uptake for dopamine, but not norepinephrine or 5-HT,  
953 increases selection of high effort instrumental activity: Implications for treatment  
954 of effort-related motivational symptoms in psychopathology.  
955 *Neuropharmacology*. 2016 Oct;109:270–80.
- 956 78. Yu AJ, Dayan P. Uncertainty, neuromodulation, and attention. *Neuron*. 2005  
957 May 19;46(4):681–92.
- 958 79. Zénon A, Devesse S, Olivier E. Dopamine Manipulation Affects Response Vigor  
959 Independently of Opportunity Cost. *J Neurosci*. 2016 Sep 14;36(37):9516–25.

960 80. Zénon A, Sidibé M, Olivier E. Pupil size variations correlate with physical effort  
961 perception. *Front Behav Neurosci* [Internet]. 2014 [cited 2017 Apr 18];8.

962

963 **Supplemental figure**

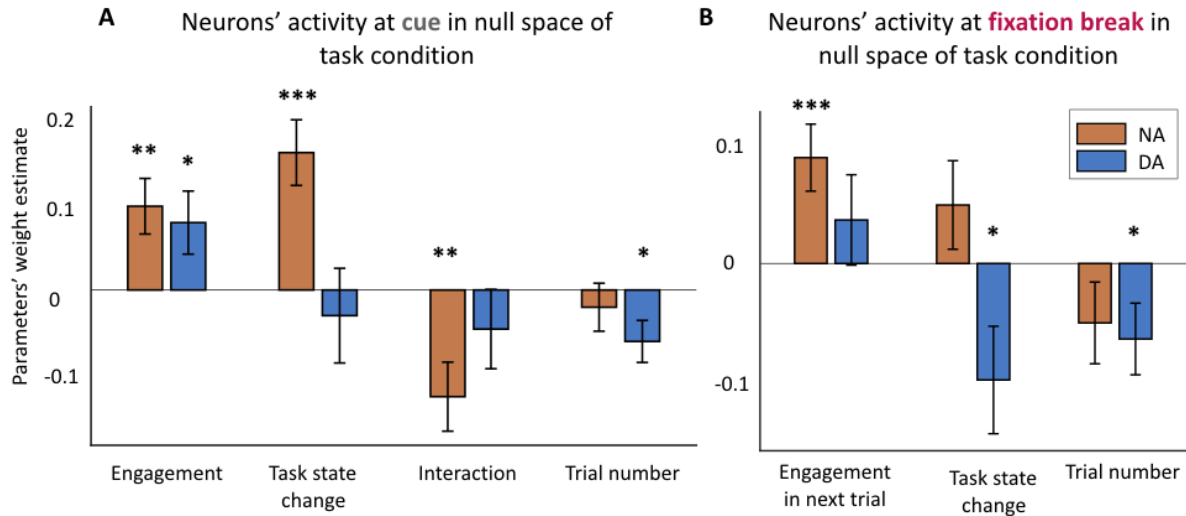

964

965 *Supplemental figure 1: Confounds do not affect the effects described at cue and fixation break*

966 *A) Encoding of engagement, task state change and trial number in null space of task condition at cue*  
967 *(0-500ms from cue onset). Noradrenergic neurons encoded significantly the task state change, the*  
968 *engagement and the interaction (all  $p < 0.01$ ). Dopaminergic neurons encoded only significantly the*  
969 *engagement ( $p < 0.05$ ) and the trial number ( $p < 0.05$ ). Interactions between trial number and engagement*  
970 *and trial number and task state change were non-significant for both populations (all  $p > 0.19$ ). \*  $p < 0.05$ ;*  
971 *\*\*  $p \leq 0.01$ ; \*\*\*  $p \leq 0.001$*

972 *B) Encoding of engagement in the next trial in null space of task condition at fixation break (0-300ms*  
973 *from fixation break). Noradrenergic neurons encoded significantly the engagement in the next trial*  
974 *( $p < 0.001$ ) even when we added the confounds: task state change and trial number (both  $p < 0.15$ ).*  
975 *Dopaminergic neurons were not significantly activated at the fixation break. However, their activity was*  
976 *negatively modulated by the task state change ( $p = 0.04$ ) and the trial number ( $p = 0.04$ ). Interactions*  
977 *between trial number and engagement in next trial and task state change and engagement in next trial*  
978 *were non-significant for both populations (all  $p > 0.23$ ). \*  $p < 0.05$ ; \*\*  $p \leq 0.01$ ; \*\*\*  $p \leq 0.001$*
